# Supplementary material
Source: publisher figshare collection journal article supplement (https://tandf.figshare.com/ndownloader/files/22164207)
Supplement: Supplementary file 1 [file 22164207]

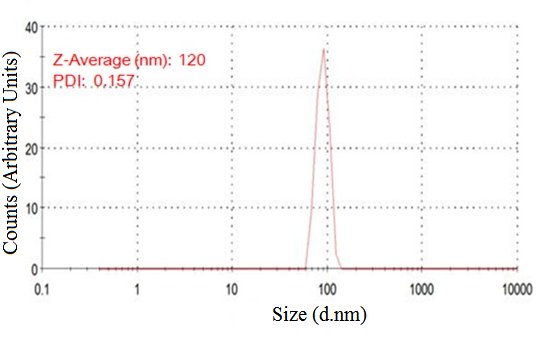


Figure S1 Size distribution of magnetic polymer by zeta measurement in water.


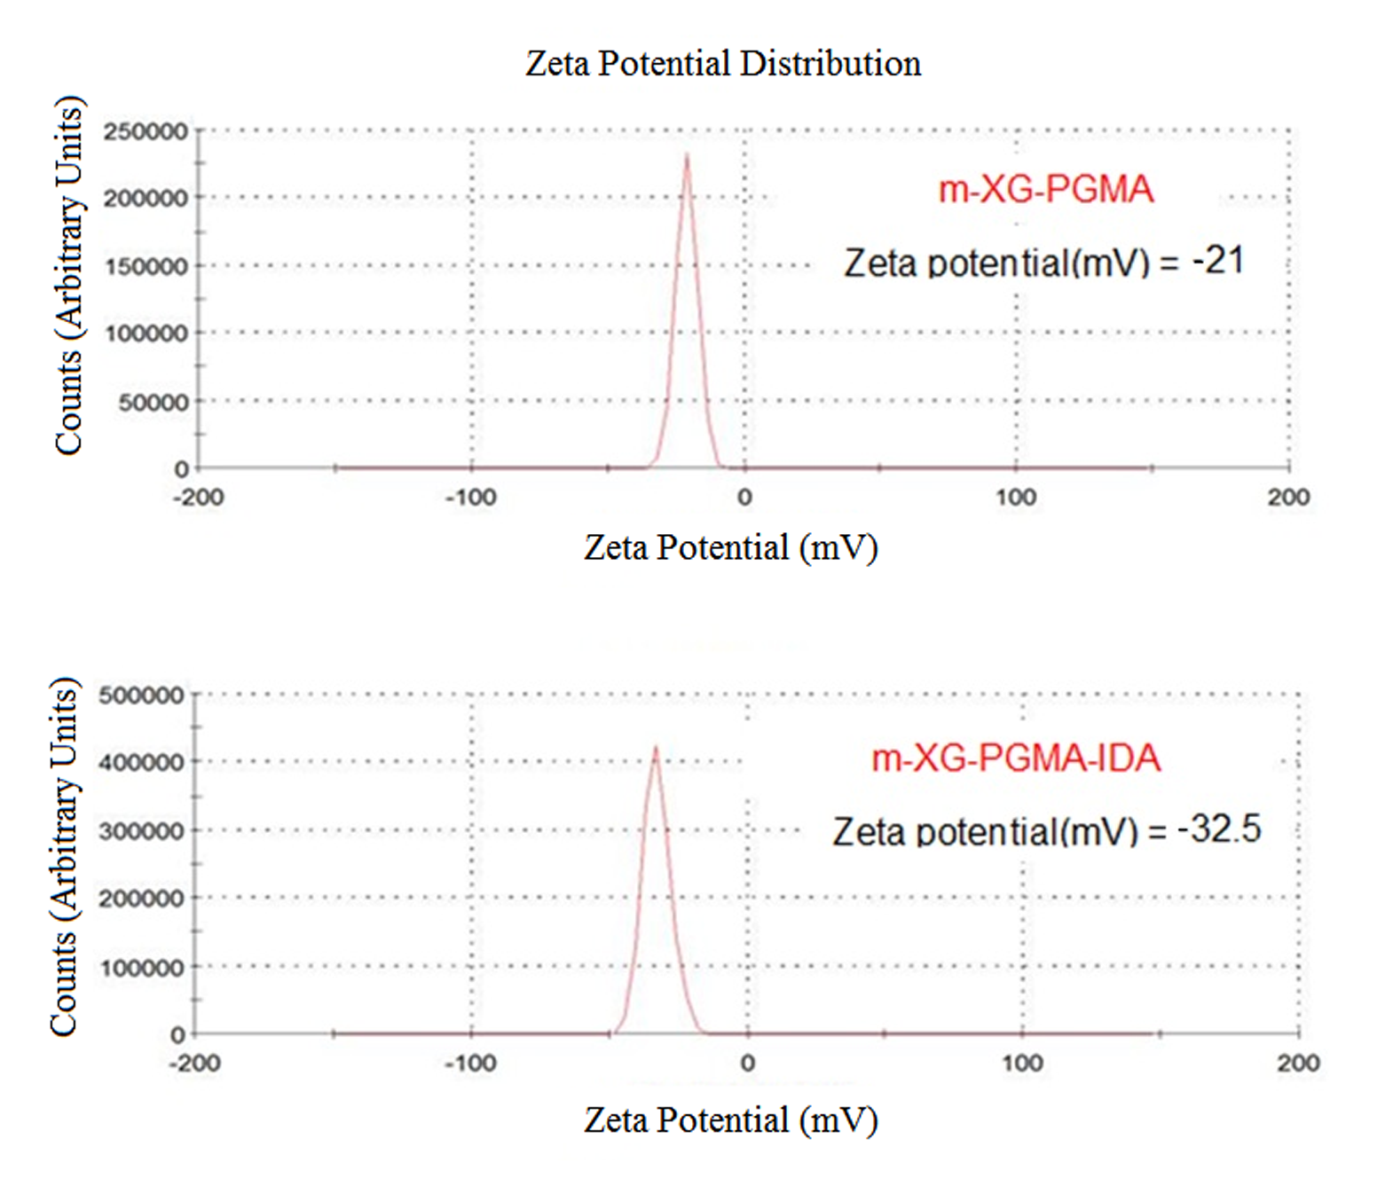


Figure S2 The change of surface charge of poly (glycidyl methacrylate)-grafted xanthan gum before and after iminodiacetic acid coupling at pH 8.
